# Supplementary material
Source: Springer Nature journal article supplement (https://www.springermedizin.de/resource/supplementary/12943_2011_991_MOESM3_ESM.PDF/9552206)

**Supplementary Figure 2: Monocytic differentiation of OCI-AML3 cells is not affected by miR-10a knockdown.** 1,25-dihydroxyvitaminD3 (VitD3) was used to induce monocytic differentiation of OCI-AML3 cells over a 96 hour period. **A.** Morphological analysis (Wright Stain) of cytopsin samples of OCI-AML3 cells treated with VitD3 demonstrated no observable differences between SCRAM control transfected and anti-miR10a LNA transfected groups. **B.** Phenotype analysis of CD14 **C.** CD15 and **D.** CD11b expression by flow cytometry did not detect a statistically significant difference between SCRAM control or anti-miR10a LNA groups at 48hr or 96hrs post, regardless if cells were treated with VitD3 (+) or did not receive treatment (-). N=3.

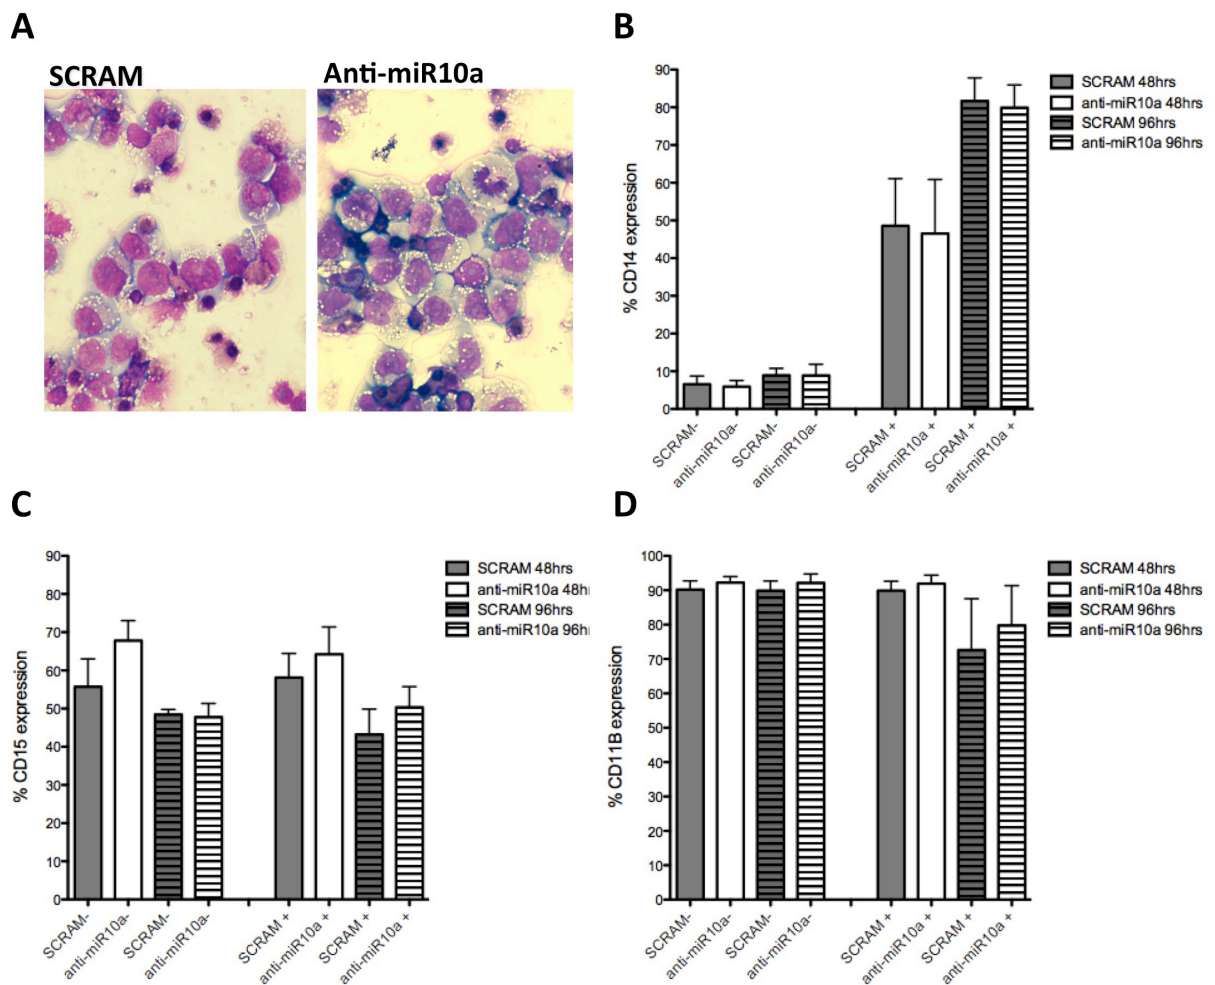

Supplement: MOESM3 [file 9552206]
